# Supplementary material
Source: Springer Nature journal article supplement (https://www.springermedizin.de/resource/supplementary/12990_2009_257_MOESM5_ESM.pdf/9612900)

CK1 $\epsilon$  /CGRP

CK1 $\epsilon$  /IB4

CK1 $\epsilon$  /CGRP

Sham

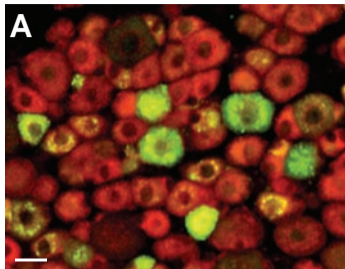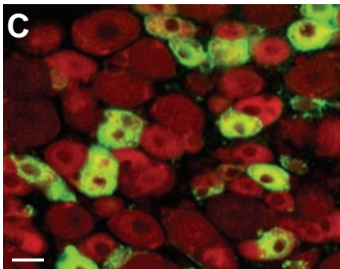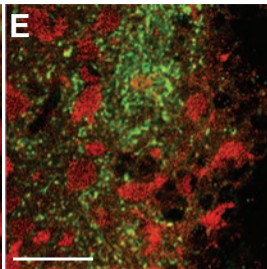

SNL

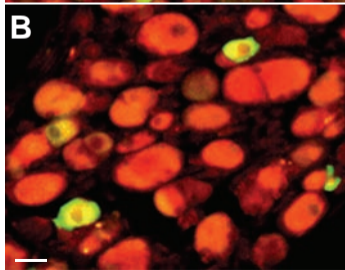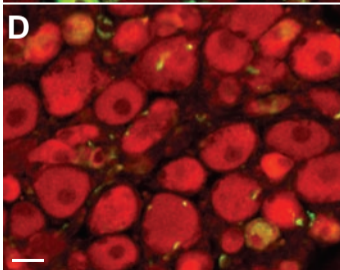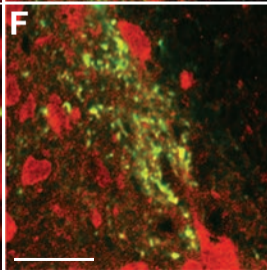

Supplement: MOESM5 [file 9612900]
